# Supplementary material for: Biochar nanoparticles alleviate salt stress in tomato (Solanum lycopersicum) seedlings
Source: Royal Society of Chemistry journal article supplement (doi:10.1039/d2en00816e), 2023-01-01
Supplement: d2en00816e1.pdf [file d2en00816e1.pdf]

## ***Supplementary Information***

### **Biochar Nanoparticles Alleviate Salt-Stress in Tomato (*Solanum lycopersicum*) Seedlings**

**Ran Tao** <sup>1,2</sup>, **Yinlong Zhang** <sup>1</sup>, **Jing Yang** <sup>3</sup>, **Tianxi Yang** <sup>4</sup>, **Jason C. White**, <sup>5</sup> **Yu Shen** <sup>1,2\*</sup>

<sup>1</sup> Co-Innovation Center for the Sustainable Forestry in Southern China, College of Biology and the Environment, Nanjing Forestry University, Nanjing, Jiangsu 210037, China;

<sup>2</sup> National Positioning Observation Station of Hung-tse Lake Wetland Ecosystem in Jiangsu Province, Nanjing, Jiangsu 210037, China;

<sup>3</sup> Electron Microscope Lab, Advance Analysis and Test Center, Nanjing Forestry University, Nanjing, Jiangsu 210037, China;

<sup>4</sup> Faculty of Land and Food Systems, The University of British Columbia, Vancouver, BC Canada, V6T 1Z4;

<sup>5</sup> The Connecticut Agricultural Experiment Station, New Haven, CT, 06504, USA.

## Content

|                                                                                   |   |
|-----------------------------------------------------------------------------------|---|
| Table S1 Biochar nanoparticles physical characteristics .....                     | 1 |
| Table S2 Biochar nanoparticles ash content and element content .....              | 2 |
| Figure S2: Na <sup>+</sup> adsorption curve by biochar nanoparticles in 72h ..... | 3 |
| Table S3: Elemental content of tomato seedlings under different treatments .....  | 4 |
| Figure S3: Dry weight of tomato seedlings. ....                                   | 5 |

## Nano-biochar physical properties

### Particle size, pH and electrical conductivity

The two samples were characterized for particle size on a Particle Size Analyzer (90 Plus, Brookhaven, USA) and for electrical conductivity and pH by an Electronic Conductivity meter (Accumet™ XL200, Fisher Scientific, USA). The detailed information is below in Table S1.

**Table S1: Biochar nanoparticles physical characteristics**

| Label | Description                       | Particle size (nm) | Zeta Potential (mV) | pH   | EC ( $\mu\text{S}/\text{cm}$ ) |
|-------|-----------------------------------|--------------------|---------------------|------|--------------------------------|
| RSB   | Nano rice biochar - 350°C treated | 253.2              | -43.80              | 9.40 | $74.75 \pm 0.82$               |
| CSB   | Nano corn biochar - 350°C treated | 259.7              | -38.47              | 9.42 | $72.38 \pm 2.49$               |

### Ash content and element analysis of nanoparticles

We used high temperature calcination to determine the ash content of each biochar sample and used an Elemental Analyzer (EA2400II, PerkinElmer, USA) to analyze the C, H, O, N, and S contents in biochar particles. The detailed information is below.

**Table S2: Biochar nanoparticle ash content and element content**

| <b>Label</b> | <b>Ash content (%)</b> | <b>C (%)</b> | <b>H (%)</b> | <b>O (%)</b> | <b>N (%)</b> | <b>S (%)</b> |
|--------------|------------------------|--------------|--------------|--------------|--------------|--------------|
| RSB          | 27.33                  | 60.75        | 1.79         | 8.27         | 1.27         | 0.62         |
| CSB          | 42.18                  | 51.21        | 1.68         | 6.91         | 1.06         | 0.24         |

## Determination of NaCl adsorption on biochar nanoparticles

In this study, we designed and implemented experiments for Na<sup>+</sup> adsorption on biochar nanoparticles in an aqueous system. We weighed 200mg of the two kinds of biochar nanoparticles and prepared 2 g/L NaCl solution. After the two solutions were fully stirred and mixed, they were shaken on a shaker at room temperature ( $25 \pm 2^\circ\text{C}$ ) with the rotating speed of 180 rpm. The mixture solution was collected at 15min and 2, 4, 8, 16, 24, 48, 72 h. The collected solution was centrifuged (12,000 rpm, 25°C, 5 min; HT/20RZ, Hunan Herexi, China) and 200  $\mu\text{l}$  of the supernatant was diluted to 10 ml to ensure that no biochar nanoparticles were present in the sample. We calculated and fitted the adsorption curves of biochar nanoparticles on Na<sup>+</sup> in Fig. S2.

In our results (Fig. S2), we found that the two biochar nanoparticles had similar ability to adsorb Na, reducing the concentration of Na<sup>+</sup> by 62.5% and 63.9%, respectively. The results also showed that equilibrium of the adsorption process was achieved quickly and was maintained over time.

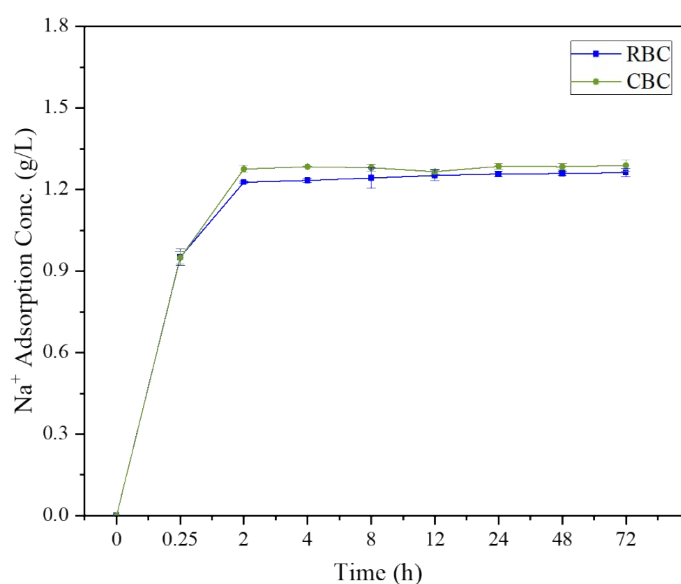

**Figure S1: Na<sup>+</sup> adsorption curve by biochar nanoparticles in 72h**

## Dry weight and elemental content of plants in greenhouse experiments

**Table S3: Elemental content of tomato seedlings**

| Label       | Element Content<br>In Root (g kg <sup>-1</sup> ) |           |            |           |           |           | In Shoot (g kg <sup>-1</sup> ) |            |            |           |           |           |
|-------------|--------------------------------------------------|-----------|------------|-----------|-----------|-----------|--------------------------------|------------|------------|-----------|-----------|-----------|
|             | Na                                               | Ca        | K          | Mg        | P         | S         | Na                             | Ca         | K          | Mg        | P         | S         |
| <b>CK</b>   | 1.55±0.01                                        | 4.04±0.29 | 11.51±3.57 | 3.66±0.26 | 1.64±0.08 | 2.18±0.08 | 0.73±0.14                      | 9.53±0.01  | 20.11±1.52 | 1.71±0.10 | 3.28±0.30 | 4.64±0.86 |
| <b>NaCl</b> | 4.03±0.19                                        | 4.86±0.17 | 13.04±0.90 | 3.08±0.16 | 2.00±0.04 | 2.00±0.13 | 2.91±0.06                      | 12.28±1.50 | 17.09±2.27 | 1.93±0.15 | 2.69±0.25 | 3.87±0.47 |
| <b>T1</b>   | 1.86±0.05                                        | 5.01±0.57 | 14.98±0.46 | 3.87±0.22 | 2.33±0.16 | 2.33±0.16 | 0.79±0.05                      | 11.12±1.07 | 22.12±0.58 | 1.88±0.15 | 3.32±0.13 | 4.63±0.52 |
| <b>T2</b>   | 4.09±0.05                                        | 4.00±0.45 | 12.62±1.10 | 3.72±0.21 | 2.45±0.16 | 2.45±0.16 | 1.89±0.22                      | 12.57±1.31 | 17.61±0.47 | 1.73±0.08 | 3.14±0.09 | 3.95±0.61 |
| <b>T3</b>   | 2.91±0.09                                        | 5.50±1.37 | 15.32±0.44 | 3.67±0.28 | 1.69±0.15 | 2.19±0.19 | 1.17±0.04                      | 11.57±1.44 | 18.94±0.88 | 1.86±0.26 | 3.62±0.07 | 4.03±0.07 |
| <b>T4</b>   | 1.62±0.07                                        | 4.44±0.20 | 16.49±0.98 | 4.20±0.21 | 1.58±0.19 | 2.50±0.07 | 0.76±0.04                      | 12.41±1.05 | 22.52±2.89 | 1.75±0.03 | 3.53±0.27 | 5.05±0.12 |
| <b>T5</b>   | 4.08±0.21                                        | 4.80±0.54 | 13.06±1.86 | 3.93±0.80 | 1.42±0.09 | 2.31±0.12 | 2.67±0.25                      | 10.00±0.55 | 10.03±0.82 | 1.50±0.06 | 2.71±0.09 | 3.47±0.29 |
| <b>T6</b>   | 2.58±0.14                                        | 4.42±0.26 | 12.95±0.25 | 3.36±0.18 | 1.42±0.17 | 2.27±0.16 | 1.09±0.06                      | 12.47±1.31 | 15.10±1.04 | 1.59±0.12 | 3.13±0.14 | 3.91±0.43 |

**Note:** CK, control; NaCl, NaCl 2000 mg kg<sup>-1</sup>; T1, 2000 mg kg<sup>-1</sup> rice straw biochar NPs; T2, 2000 mg kg<sup>-1</sup> rice straw biochar NPs + 2000 mg kg<sup>-1</sup> NaCl; T3, 2000 mg kg<sup>-1</sup> rice straw biochar NPs + 1000 mg kg<sup>-1</sup> NaCl; T4, 2000 mg kg<sup>-1</sup> corn straw biochar NPs; T5, 2000 mg kg<sup>-1</sup> corn straw biochar NPs +2000 mg kg<sup>-1</sup> NaCl; T6, 2000 mg kg<sup>-1</sup> corn straw biochar NPs +1000 mg kg<sup>-1</sup> NaCl.

## Dry weight of tomato seedlings

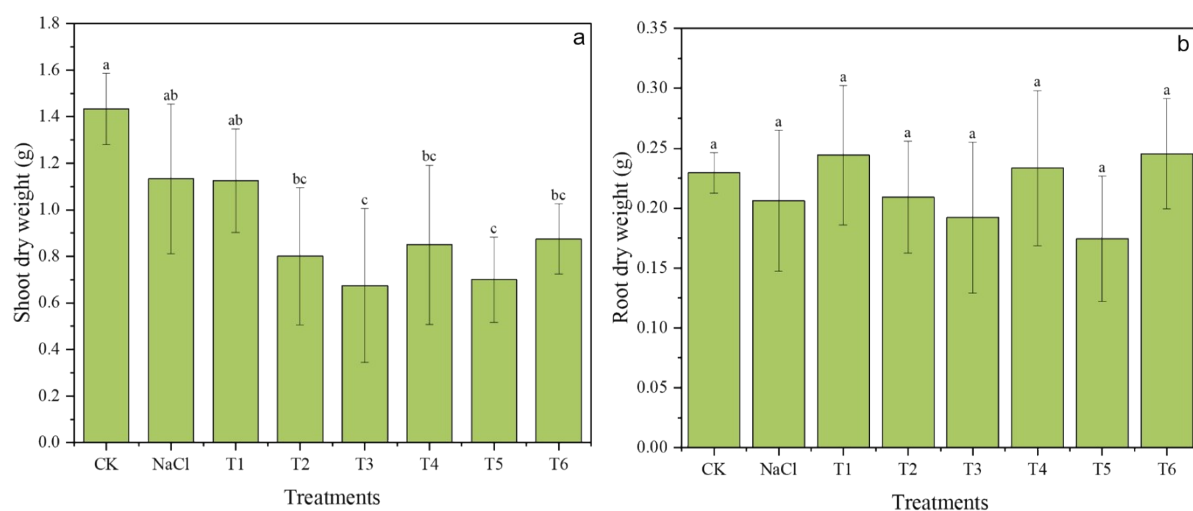

**Figure S2: Dry weight of tomato seedlings (a)shoot and (b)root.**

**Note:** CK, untreated control; NaCl, NaCl 2000 mg kg<sup>-1</sup>; T1, 2000 mg kg<sup>-1</sup> rice straw biochar NPs; T2, 2000 mg kg<sup>-1</sup> rice straw biochar NPs + 2000 mg kg<sup>-1</sup> NaCl; T3, 2000 mg kg<sup>-1</sup> rice straw biochar NPs + 1000 mg kg<sup>-1</sup> NaCl; T4, 2000 mg kg<sup>-1</sup> corn straw biochar NPs; T5, 2000 mg kg<sup>-1</sup> corn straw biochar NPs +2000 mg kg<sup>-1</sup> NaCl; T6, 2000 mg kg<sup>-1</sup> corn straw biochar NPs +1000 mg kg<sup>-1</sup> NaCl.
